# Supplementary material
Source: HighWire-hosted journal article supplement (https://www.ajnr.org/highwire/filestream/76102/field_highwire_adjunct_files/0/20-00587.pdf)
Supplement: 20-00587.pdf [file 20-00587.pdf]

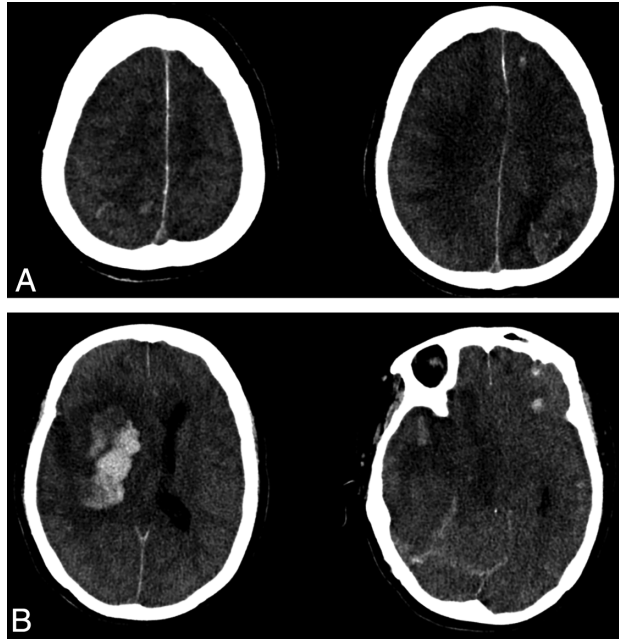

**ON-LINE FIGURE.** Patient 4. CT of the brain showing a right temporal parenchymal hematoma with mass effect and extensive surrounding edema (suggesting it may be subacute). Also present are multiple subcortical/cortical petechial-type hemorrhages in various vascular territories, eg, the left frontal and temporal lobes and the right temporal lobe. These are of varying densities, suggesting that they may be of different ages. A small bilateral isodense subdural hematoma without significant mass effect is also present. (The apparent right-sided falcotentorial subdural hematoma merely reflects volume-averaging on the image slices shown).
